# Supplementary material for: Orthogonal biofunctionalization of magnetic nanoparticles via “clickable” poly(ethylene glycol) silanes: a “universal ligand” strategy to design stealth and target-specific nanocarriers
Source: Royal Society of Chemistry journal article supplement (doi:10.1039/c2jm34571d), 2012-01-01
Supplement: c2jm34571d.pdf [file c2jm34571d.pdf]

# Orthogonal Biofunctionalization of Magnetic Nanoparticles via “Clickable” Poly-(Ethylene Glycol) Silanes: A “Universal Ligand” Strategy to Design Stealth and Target-Specific Nanocarriers

Manasmita Das<sup>1,\*</sup>, Debarati Bandyopadhyay<sup>2</sup>, Ramanpreet Singh<sup>1</sup>, Sunil Kumar<sup>1</sup>,  
Sanyog Jain<sup>1,\*</sup>

<sup>1</sup>Centre of Pharmaceutical Nanotechnology, Department of Pharmaceutics, National Institute of Pharmaceutical Education and Research (NIPER), Sector-67, S.A.S. Nagar, Mohali 160062

<sup>2</sup>Molecular Biophysics Unit, Indian Institute of Science Bangalore, Bangalore 560012, INDIA

## Supporting Information

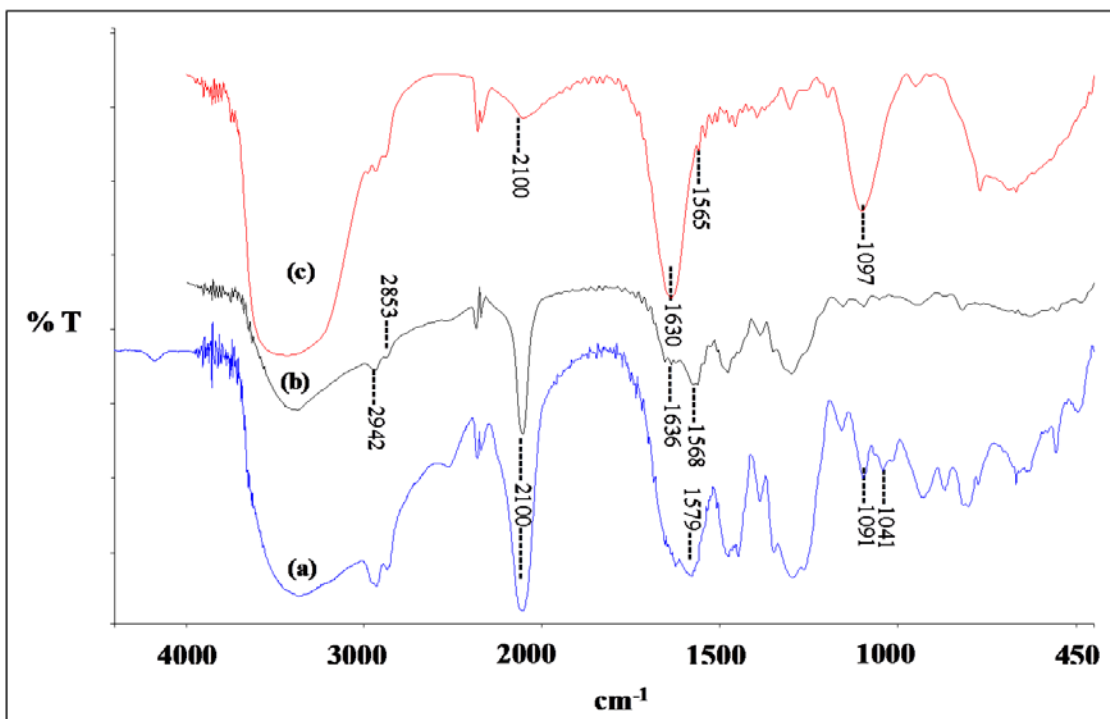

**Figure S1.** FTIR spectra of (a) PEG-diazide; (b) PEG-monoamine and (c) Azido-PEG-silane

FTIR spectrum of PEG std. exhibits prominent bands between 1020-1090  $\text{cm}^{-1}$  due to asymmetric C-O-C stretching of the repeating  $-\text{O}-\text{CH}_2-\text{CH}_2-\text{O}-$  units of the polymer. The transformation of PEG terminal hydroxyl groups to corresponding diazide was accompanied with the appearance of a new peak at 2100  $\text{cm}^{-1}$ . This band assigns to the asymmetric stretching of the  $-\text{N}=\text{N}=\text{N}$  bond of the azide group. Following dysymmetrization of the diazide to monoamine intermediate, a notable decrease in the intensity of 2100  $\text{cm}^{-1}$  peak was observed, testifying the partial reduction of diazide to its corresponding azido-amino derivative. FTIR spectrum of the final product presented a broad band in the range of 1097  $\text{cm}^{-1}$ , characteristic of Si-O stretching vibration of the PEG-silane, superimposed with asymmetric C-O-C stretching of the repeating  $-\text{O}-\text{CH}_2-\text{CH}_2-\text{O}-$  units.

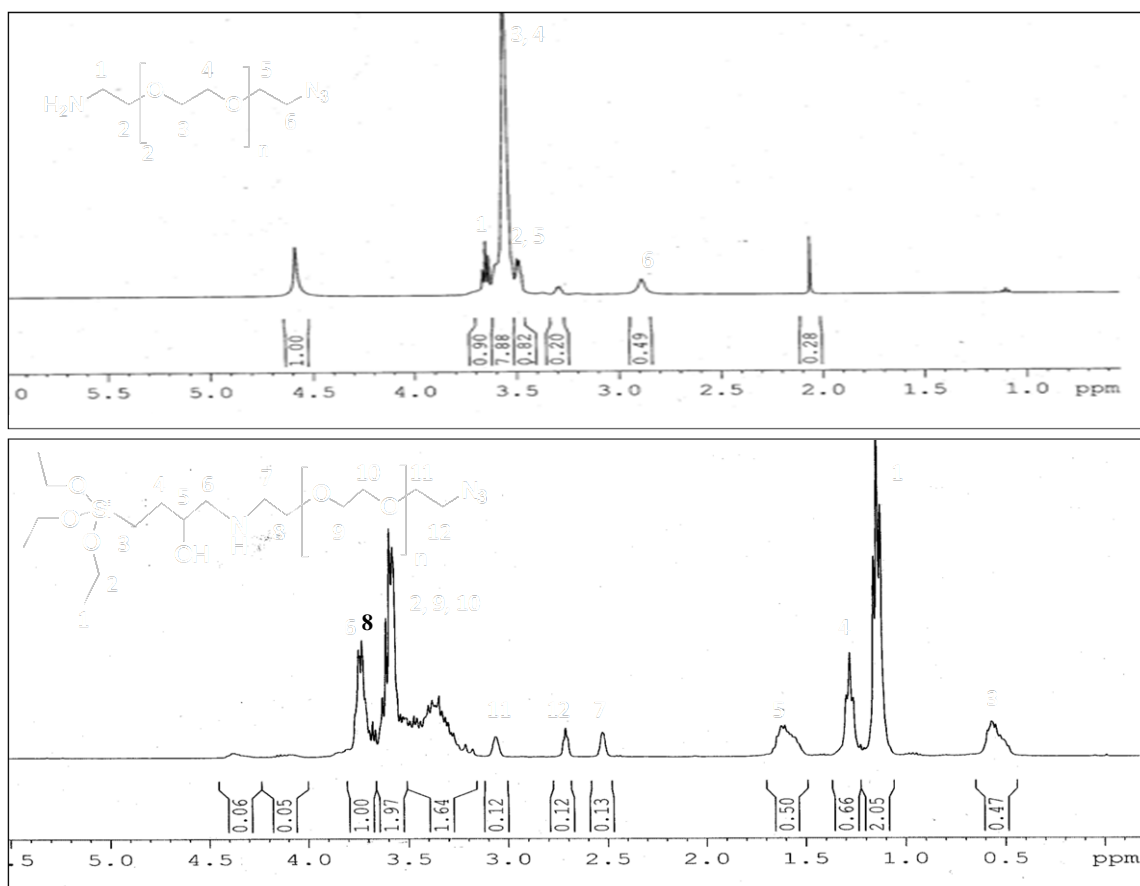

**Figure S2.**  $^1\text{H}$  NMR spectra of  $\alpha$ -amino  $\omega$ -azido PEG and the corresponding azido-PEG-silane

The NMR spectrum of the monoamine derivative (See supporting information, Figure S1) presents the characteristic triplets of approximately 2H intensity at  $\delta$  3.66 and 3.47 ppm. These

peaks may be assigned to the  $-\text{O}-\text{CH}_2$  and  $-\text{CH}_2-\text{NH}_2$  protons of  $-\text{O}-\text{CH}_2-\text{CH}_2-\text{NH}_2$  moiety of the PEG segment respectively. The broad singlet at 3.54 ppm may be assigned to the  $-\text{CH}_2$  protons of the repeating  $-\text{O}-\text{CH}_2-\text{CH}_2-\text{O}$  units of PEG whereas the  $-\text{CH}_2$  protons adjacent to the azide moiety appears at  $\delta$  2.86 ppm. The chemical shifts for protons from position 1 to 12 of the azido silane have been shown in figure 2(b). As expected, characteristic proton peaks of  $-\text{O}-\text{CH}_2-\text{CH}_2-$  repeating units appeared in the range of  $\delta$  3.3-3.8 ppm. Of note, a new quartet appeared in the range of  $\delta$  3.6-3.7 ppm. Superimposed with the methylene protons of PEG, this new peak may be ascribed to the  $-\text{O}-\text{CH}_2$  protons of the  $-\text{Si}(\text{OCH}_2\text{CH}_3)$  unit. It was further interesting to observe that the triplets corresponding to  $-\text{O}-\text{CH}_2$  and  $-\text{CH}_2-\text{N}_3$  methylenic protons of the  $-\text{O}-\text{CH}_2-\text{CH}_2-\text{N}_3$  terminus up-shifted to  $\delta$  3.06 and 2.71 ppm as compared to 3.47 and 2.86 ppm in the azido-amine derivative. In addition to these shifts, a highly shielded triplet was noted at 0.6 ppm. This peak was assigned to the methylene protons adjacent to  $>\text{Si}<$  centre. In line with our expectation, a sharp triplet at 1.2 ppm was observed; this new peak was assigned to the methyl protons of the  $-\text{Si}(\text{OCH}_2\text{CH}_3)$  head-group.

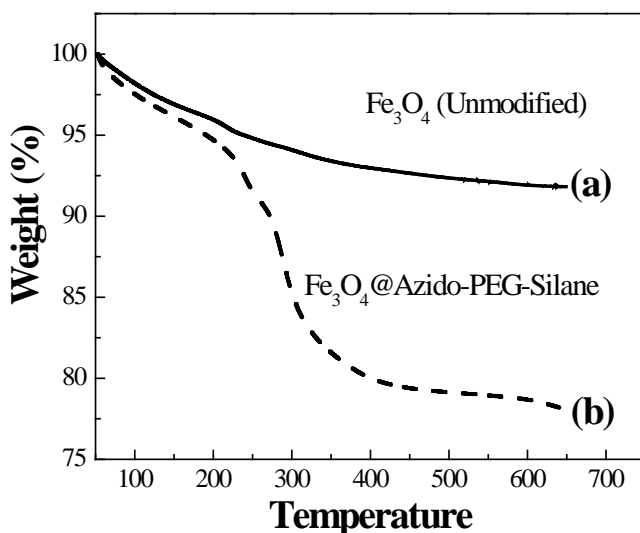

**Figure S3.** TG thermogram of (a) blank  $\text{Fe}_3\text{O}_4$  and (b) azido-PEG-silane immobilized  $\text{Fe}_3\text{O}_4$

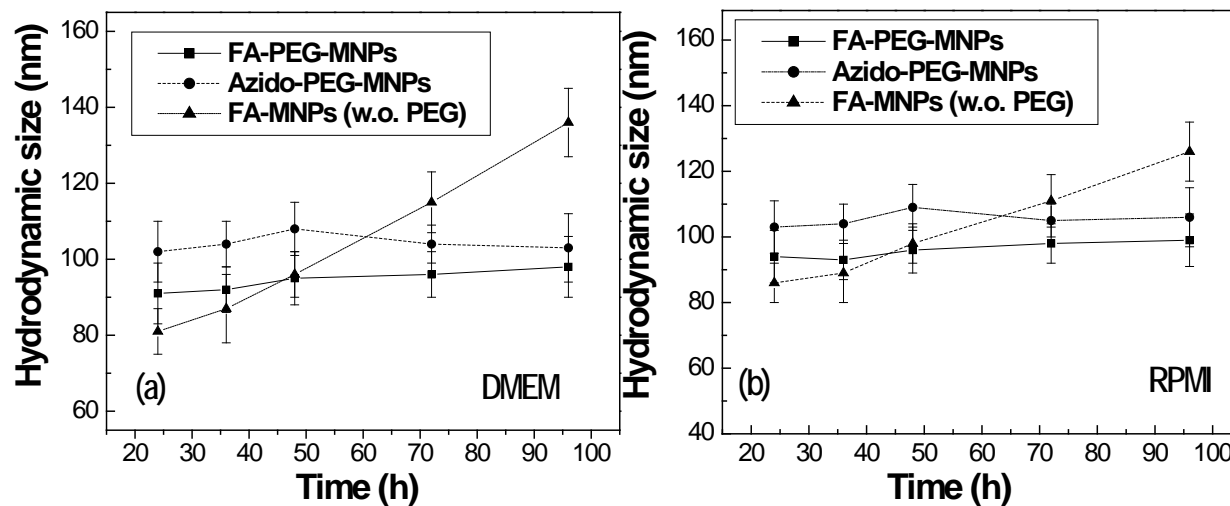

**Figure S4.** Effect of culture medium on the size of MNPs: (a) and (b) represents incubation in DMEM and RPMI media respectively. PEGylated MNPs showed minimal deterioration in particle size indicating lack of protein adsorption on MNP surface.

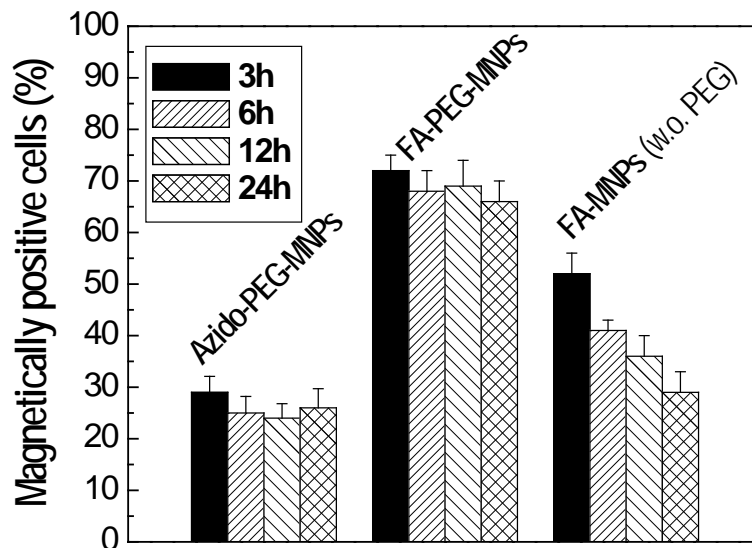

**Figure S5.** Time dependent uptake of PEGylated and non-PEGylated MNPs in A549 cells in presence of 10% serum containing culture media. No significant change in the cellular uptake of azido-PEG-MNPs and FA-PEG-MNPs was observed even after 24 h incubation in presence of serum. Contrastingly, uptake of FA-MNPs was significantly deteriorated when the incubation period was gradually increased from 3-24h.

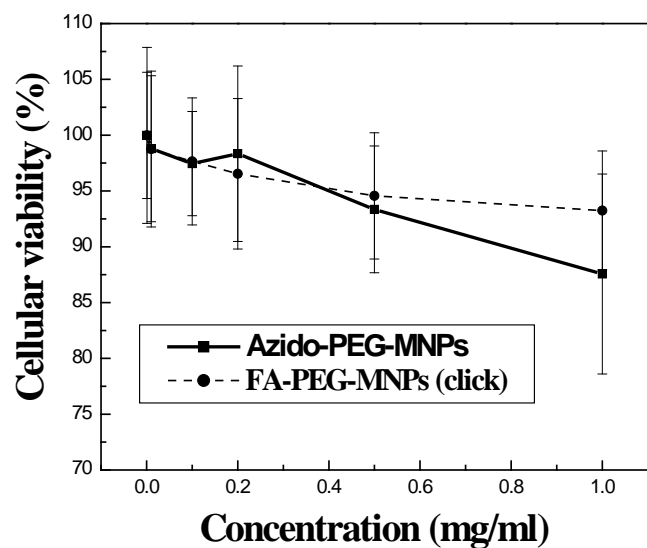

**Figure S6.** Cytotoxicity profile of azido-PEG-MNPs and FA-PEG-MNPs in A549 cell line

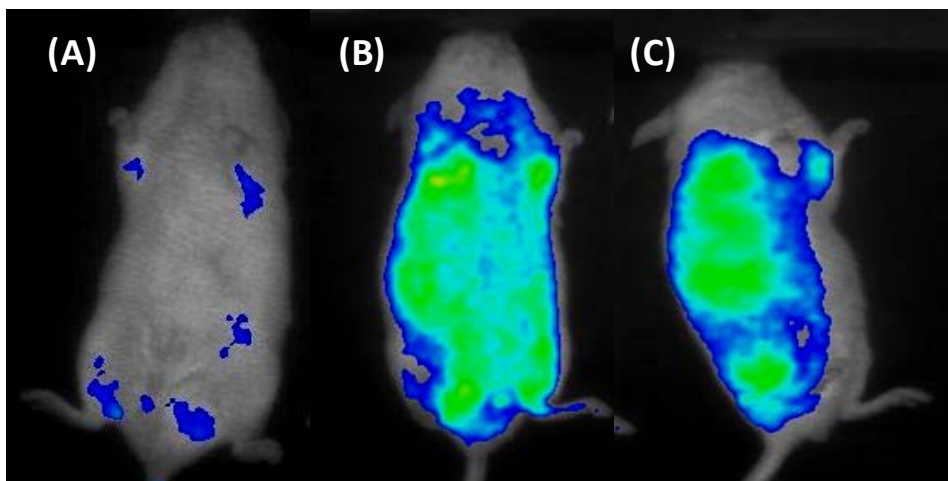

**Figure S7.** Photon image of (A) untreated animals (B, C) intact animals labeled with dye labeled aminosilane coated non-PEGylated MNPs (control) and FA-PEG-MNPs respectively.
